# Supplementary material for: Structural exploration of hydrophobic core in polycationic micelles for improving siRNA delivery efficiency and cell viability
Source: Royal Society of Chemistry journal article supplement (doi:10.1039/c8tb02706d), 2019-01-01
Supplement: c8tb02706d1.pdf [file c8tb02706d1.pdf]

## Supporting information

### Structural Exploration of Hydrophobic Core in Polycationic Micelles for Improving siRNA Delivery Efficiency and Cell Viability

Wenjun Huang<sup>±a</sup>, Xiaoxia Wang<sup>±b</sup>, Changrong Wang<sup>a</sup>, Lili Du<sup>b</sup>, Jianhua Zhang<sup>a</sup>, Liandong Deng<sup>a</sup>, Huiqing Cao<sup>b</sup>, Anjie Dong<sup>\*a,c</sup>

<sup>a</sup> Department of Polymer Science and Technology, School of Chemical Engineering and Technology, Key Laboratory of Systems Bioengineering (Ministry of Education), Tianjin University, Tianjin 300072, China.

<sup>b</sup> Laboratory of Nucleic Acid Technology, Institute of Molecular Medicine, Peking University, Beijing 100871, China.

<sup>c</sup> Collaborative Innovation Center of Chemical Science and Engineering (Tianjin), Tianjin 300072, China.

\*Corresponding Author: Anjie Dong, E-mail: ajdong@tju.edu.cn

± Dual contributors

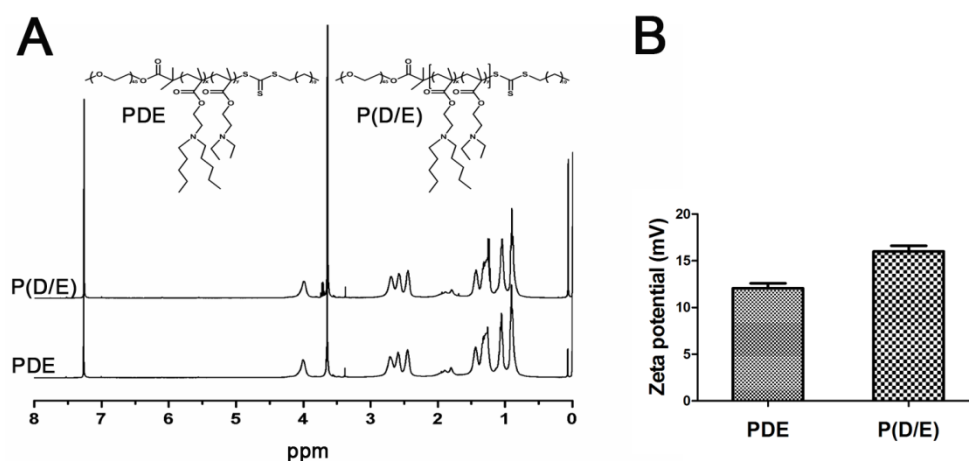

Fig. S1. (A) <sup>1</sup>H NMR spectra of PDE and P(D/E). (B) Zeta potential values of two PDE and P(D/E) measured by DLS.

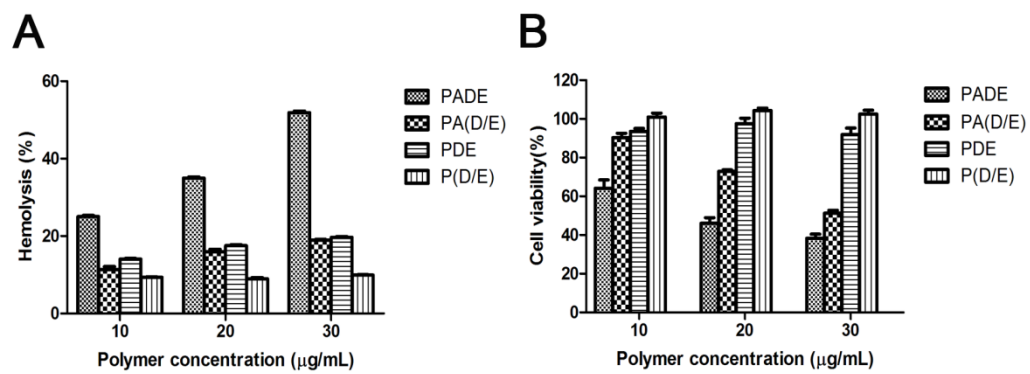

Fig.S2. (A) The hemolysis assay of PADE, PA(D/E), PDE and P(D/E) detected in different concentrations. (B) The cell viability of HepG2 cells detected after transfected for 24h.
